# Supplementary material for: Evaluating the Usability and Perceived Impact of an Electronic Medical Record Toolkit for Atrial Fibrillation Management in Primary Care: A Mixed-Methods Study Incorporating Human Factors Design
Source: PubMed Central journal article supplement (PMC4811663; doi:10.2196/humanfactors.4289), 2016-02-17
Supplement: humanfactors_v3i1e7_app1.pdf [file humanfactors_v3i1e7_app1.pdf]

# EMR Toolkit.

## (A) Initial assessment form.

Feb 16, 2016 Atrial Fibrillation Initial Assessment AV

**History**

AFIB confirmed via ECG  
 document AFIB in CPP

• Pattern

Severity of AFIB

[learn more...](#)

**OBJECTIVE**

Apical HR:

regular

BP:

JVP elevated  
 carotid bruit  
 normal heart sounds  
 murmur  
 ankle edema  
 peripheral pulses present

**Investigations**

TSH  
 CBC  
 ALT  
 Hb A1C  
 ECG  
 echocardiogram  
 sleep study  
 stress test

**Education**

Avoid alcohol, caffeine, nicotine  
 Discussed medication side effects, interactions, and monitoring  
 Patient handouts given

**FINISH**

**SUBJECTIVE**

Current Symptoms:

palpitations  
 chest pain  
 lightheadedness  
 fatigue  
 decrease in exercise capacity  
 dyspnea  
 syncope

Triggers:

(e.g. alcohol, caffeine)

**Risk Factors**

Hypertension

Sleep Apnea

Diabetes

Hyperthyroidism

Left Ventricular Dysfunction

Mitral Stenosis

Rheumatic Heart Disease

Coronary Heart Disease

**PLAN**

**Stroke Prevention**

→ [calculate stroke risk](#)

oral anticoagulation [more info](#)  
 ASA  
 Other antiplatelet

▲ Reassess stroke risk when:  
 1. Reached aged 65 yrs or 75 yrs  
 2. New dx of DM, CHF, HTN, stroke/TIA, vascular disease

Adherence

adverse effects / bleeding

**Rate Control**

Target HR less than 100

BB  
 CCB  
 digoxin [more info](#)

**Follow-up**

Referral to cardiology  
 Referral to internal medicine

Followup in:

**FINISH**

CognisantMD

## (B) Follow-up visit form.

Feb 16, 2016 AFIB Follow Up Visit AV

[view Flowsheet](#) CognisantMD

**SUBJECTIVE**

**Current Symptoms:**

palpitations  
 fatigue  
 dyspnea  
 lightheadedness  
 chest pain  
 bleeding  
 bruising

• Severity of AFIB

[learn more...](#)

**ASSESSMENT:**

**Current Stroke Prevention:**

→ [calculate stroke risk](#)

oral anticoagulation  
 ASA  
 Other antiplatelet

▲ Reassess stroke risk if:  
 1. Reached aged 65 yrs or 75 yrs  
 2. New dx of DM, CHF, HTN, stroke/TIA, vascular disease

Adherence

**FINISH**

**OBJECTIVE:**

**Physical Exam:**

Apical HR:

BP:

Normal heart sounds  
 Chest Clear

**Latest Labs:**

Monitored by specialist:

Last monitored on:

Hb PRIVATE  
 Platelets PRIVATE  
 INR 2.5  
 Creatinine 70  
 eGFR PRIVATE

**PLAN**

**Rate/Rhythm**

Continue current regimen  
 Change current treatment [more info](#)

**Stroke Prevention**

Continue current regimen  
 Change current treatment [more info](#)

**Investigations**

CBC  
 INR  
 Cr / eGFR

**Education**

Patient handouts given

Follow up in

Other:

**FINISH**

(C) Stroke and bleeding risk calculator.

**Special Note** Stroke and Bleeding Risk Tool JEL/dc CognisantMD\* X

**Stroke Risk**

Moderate to severe mitral stenosis

**CHADS2**

Congestive heart failure or EF <= 35%

Hypertension

Age >= 75 [Learn more](#)

Diabetes Mellitus

Stroke, TIA or systemic emboli

---

Vascular disease (previous MI, PAD or aortic plaque)

Age 65 to 74 [Learn more](#)

Female

None of the above

**Bleeding Risk**

Systolic >= 160mmHg

Abnormal renal function (dialysis, transplant or Cr > 200)

Abnormal liver function (cirrhosis or bili >2X normal + AST/ALT/ALP > 3X normal)

Stroke

Bleeding history or disposition [Learn more](#)

Labile INR (INR in range less than 60% of time)

Elderly (Age > 65 years)

Drugs (concomitant NSAIDs, antiplatelets) [Learn more](#)

Alcohol (more than 7 drinks / week)

None of the above

Other considerations (e.g. risk of frequent/traumatic falls) [Learn more](#)

**Annual Stroke Risk: 4.0% (3.1-5.1)** **Annual Bleeding Risk: 1.02%**

**Recommendations:**

**\*\* Based on stroke risk, oral anticoagulation is recommended. \*\***  
Remind the patient that 20% of strokes due to AFIB are fatal and 60% result in permanent disability [1]. Treatment with anticoagulation reduces this risk by 60-70% and aspirin reduces this risk by 20-25% [2].

Latest recorded systolic BP: PRIVATE  
Latest creatinine: 70

[→ References](#)
